# Supplementary material for: Iron Deficiency Generates Oxidative Stress and Activation of the SOS Response in Caulobacter crescentus
Source: PubMed Central journal article supplement (PMC6120978; doi:10.3389/fmicb.2018.02014), 2018-08-28
Supplement: Data_Sheet_2.pdf [file Data_Sheet_2.pdf]

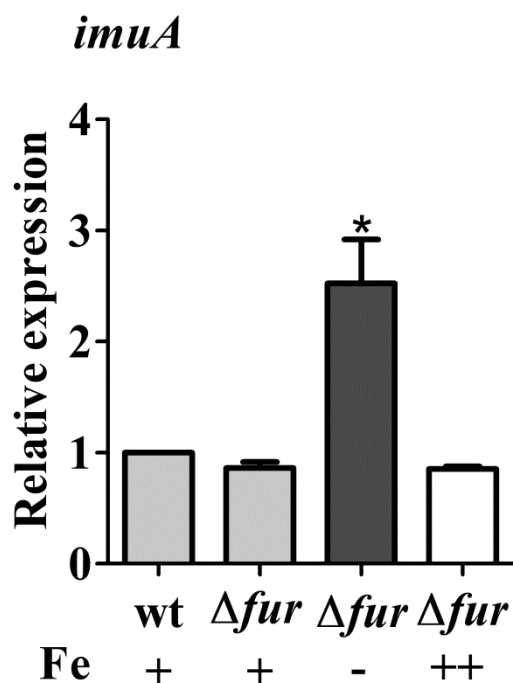

**Supplementary Figure S2.** Expression of *imuA* in the *fur* mutant. Gene expression was assessed by RT-qPCR from wild type NA1000 (wt) and the Fur mutant ( $\Delta fur$ ) cultures grown in either M2, iron limited M2 (no iron added) for 4 h and iron-supplemented M2 (with 100 mM FeSO<sub>4</sub>) for 2 h. Bars with asterisks (\*) are significantly different from wt in M2 medium; (\*\*) indicates that the results of  $\Delta fur$  in M2 and  $\Delta fur$  in iron-supplemented M2 are significantly different from each other ( $P < 0.05$ ) by One Way ANOVA test.
